# Supplementary material for: Synthesis, chloride-ion diffusion mechanisms, and anisotropic sintering of 2D layered erbium oxychloride nanoplatelets
Source: Royal Society of Chemistry journal article supplement (doi:10.1039/d4ce00585f), 2024-01-01
Supplement: d4ce00585f1.pdf [file d4ce00585f1.pdf]

# Synthesis, Chloride-Ion Diffusion Mechanisms, and Anisotropic Sintering of 2D Layered Erbium Oxychloride Nanoplatelets

Jingxiang Cheng,<sup>a,b</sup> Malsha Udayakantha,<sup>a,b</sup> Saul Perez-Beltran,<sup>a,b</sup> Luis Carrillo,<sup>a,b</sup> Wasif Zaheer,<sup>a,b</sup> Lucia Zuin,<sup>c</sup> and Sarbajit Banerjee<sup>a,b\*</sup>

<sup>a</sup> Department of Chemistry, Texas A&M University, College Station, TX 77843-3012, United States; Email: [banerjee@chem.tamu.edu](mailto:banerjee@chem.tamu.edu)

<sup>b</sup> Department of Material Science and Engineering, Texas A&M University, College Station, TX 77843-3012, United States

<sup>c</sup> Canadian Light Source, University of Saskatchewan, Saskatoon, SK S7N 2V3, Canada

## Supplementary Information

---

\*Corresponding Authors.

E-mail Address: [Banerjee@chem.tamu.edu](mailto:Banerjee@chem.tamu.edu) (Prof. Sarbajit Banerjee)

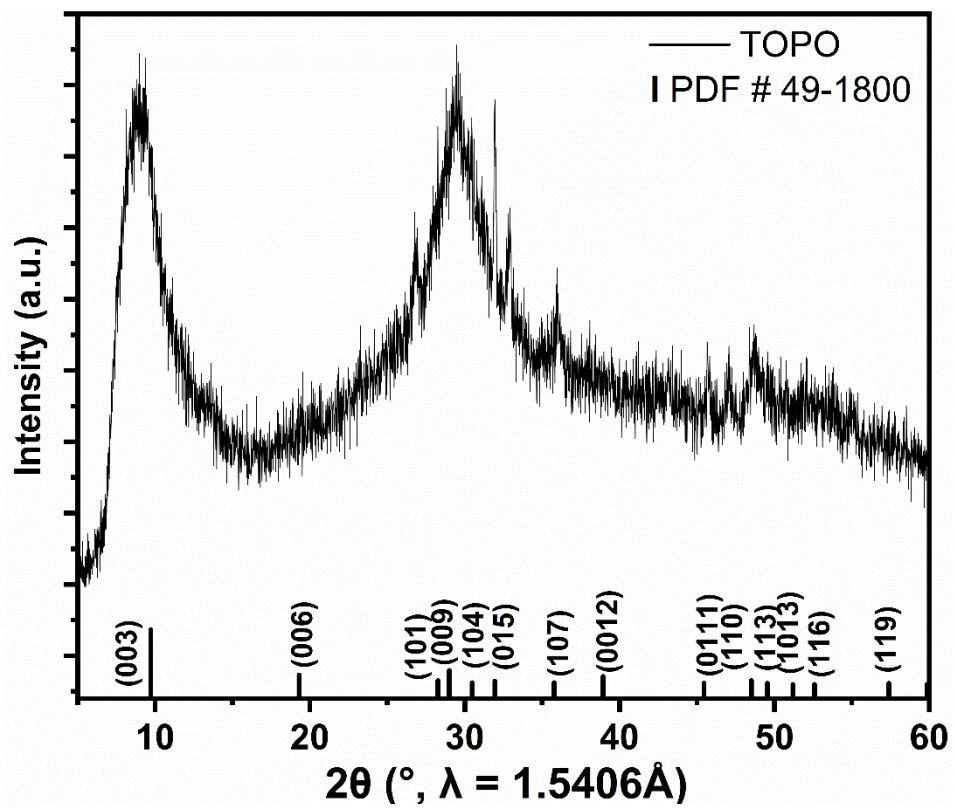

Figure S1: Powder XRD pattern of ErOCl prepared using TOPO as the coordinating ligand indexed to a  $R\bar{3}m$  unit cell (PDF#49-1800, black ticks).

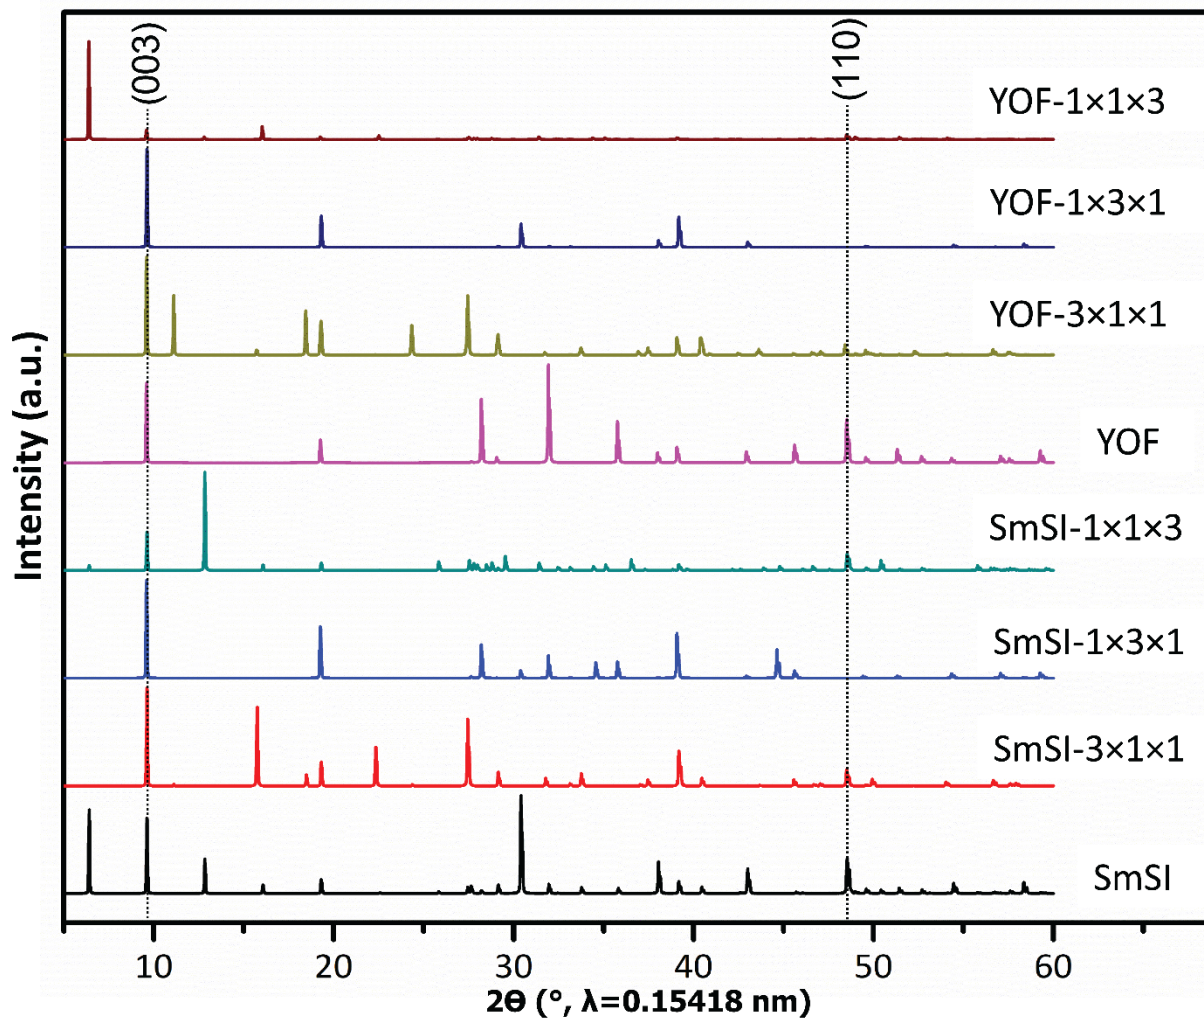

Figure S2: Simulated X-ray diffraction patterns of supercells of SmSI and YOF variants illustrating the impact of directional sintering on relative intensities of reflections.

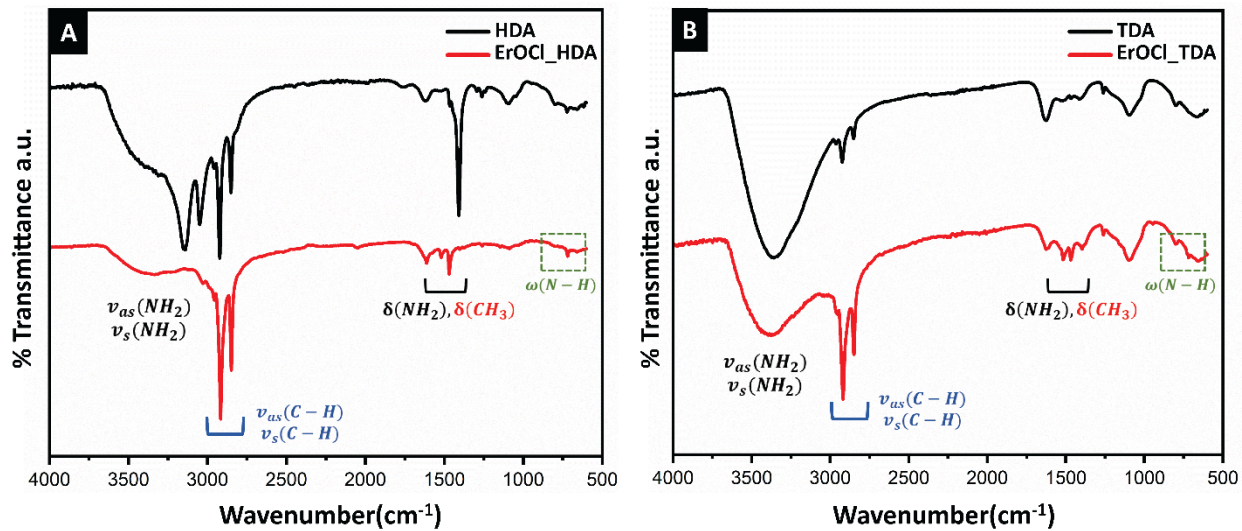

Figure S3: (A) FTIR spectra of hexadecylamine (black) and HDA-capped ErOCl (red) indicating the presence of hexadecylamine as a capping ligand. (B) FTIR spectrum of tetradecylamine (black) and TDA-capped ErOCl (red) indicating the role of tetradecylamine as a capping ligand. Note:  $\nu$  = stretching vibrational modes;  $\delta$  = bending vibrational modes;  $\omega$  = wagging and scissoring modes.
